# Supplementary material
Source: PubMed Central journal article supplement (PMC5710607)
Supplement: jamapsychiatry-74-1259-s001.pdf [file jamapsychiatry-74-1259-s001.pdf]

## Supplementary Online Content

Terracciano A, An Y, Sutin AR, Thambisetty M, Resnick SM. Personality change in the preclinical phase of Alzheimer disease. *JAMA Psychiatry*. Published online September 20, 2017. doi:10.1001/jamapsychiatry.2017.2816

### **eMethods.** NEO-PI Administration

**eTable 1.** Estimates From Hierarchical Linear Modeling (HLM) Analyses That Compared AD to Non-Impaired and Testing Linear and Quadratic Slope

**eTable 2.** Estimates From Hierarchical Linear Modeling (HLM) Analyses That Compared AD to Non-Impaired Excluding NEO-PI (1980-1986) Assessments

**eTable 3.** Estimates From Hierarchical Linear Modeling (HLM) Analyses That Compared AD to Non-Impaired Among Individuals With 2 or More Personality Assessment (Excluding Individuals With Only One Personality Assessment)

**eTable 4.** Estimates From Hierarchical Linear Modeling (HLM) Analyses That Compared All-Cause Dementia and MCI to Non-Impaired

**eTable 5.** Estimates From Hierarchical Linear Modeling (HLM) Analyses That Compared AD, Other Dementias, and MCI to Non-Impaired

**eTable 6.** Estimates From Hierarchical Linear Modeling (HLM) Analyses for Neuroticism Facets

**eTable 7.** Estimates From Hierarchical Linear Modeling (HLM) Analyses for Extraversion Facets

**eTable 8.** Estimates From Hierarchical Linear Modeling (HLM) Analyses for Openness Facets

**eTable 9.** Estimates From Hierarchical Linear Modeling (HLM) Analyses for Agreeableness Facets

**eTable 10.** Estimates From Hierarchical Linear Modeling (HLM) Analyses for Conscientiousness Facets

**eTable 11.** Mean-Level and Rank-Order Stability Over Last Two Personality Assessments

This supplementary material has been provided by the authors to give readers additional information about their work.

## **eMethods.** NEO-PI Administration

The NEO-PI, an early version of the NEO-PI-R, was administered to a subgroup of the BLSA participants in 1980 and 1986. The NEO-PI-R has been administered to BLSA participants since 1989. The analyses included 414 assessments from 1980 (NEO-PI), 516 assessments from 1986 (NEO-PI), and 7,735 assessments completed between 1989 and 2016 (NEO-PI-R).

The NEO-PI overlaps with the NEO-PI-R for neuroticism, extraversion, and openness items. However, in 1980 there were no items for agreeableness and conscientiousness, and in 1986 there were 18 items each for agreeableness and conscientiousness. To examine the comparability of scores on NEO-PI-R with the earlier NEO-PI, we examined the correlation and the mean-level differences between the 1986 scores and the first available NEO-PI-R scores (an average of 8.32 years later) in a sample of 380 participants with available data. The correlations were 0.78 for neuroticism, 0.83 for extraversion, 0.85 for openness, 0.67 for agreeableness, and 0.71 for conscientiousness ( $p < .01$ ). There were small mean-level differences between the 1986 NEO-PI and the first available NEO-PI-R, with significantly higher extraversion ( $d = .14$ ;  $p < .01$ ) and lower openness ( $d = .10$ ;  $p < .01$ ) with the NEO-PI-R. For the other traits the differences were not significant, and overall these results suggest that the data across the two versions are comparable.

To examine the potential impact of change in the personality instrument, we repeated the primary analyses excluding the 1980 and 1986 assessments that used the earlier version of the NEO-PI-R. These sensitivity analyses were thus based on data from 1989 and later years all of which were collected with the same questionnaire, the NEO-PI-R. The results of these analyses were essentially identical to those found in the full sample (eTable 2).

eTable 1. Estimates From Hierarchical Linear Modeling (HLM) Analyses That Compared AD to Non-Impaired and Testing Linear and Quadratic Slope

|                  | Neuroticism |     |      | Extraversion |     |      | Openness |     |      | Agreeableness |     |      | Conscientiousness |     |      |
|------------------|-------------|-----|------|--------------|-----|------|----------|-----|------|---------------|-----|------|-------------------|-----|------|
|                  | b           | SE  | P    | b            | SE  | P    | b        | SE  | P    | b             | SE  | P    | b                 | SE  | P    |
| INTERCEPT        | 45.83       | .34 | .000 | 48.52        | .37 | .000 | 48.66    | .37 | .000 | 49.51         | .36 | .000 | 51.78             | .38 | .000 |
| Sex (female=1)   | .68         | .41 | .100 | 1.13         | .44 | .010 | 3.85     | .45 | .000 | 5.36          | .43 | .000 | -.28              | .45 | .538 |
| Age              | -.13        | .21 | .535 | -1.68        | .22 | .000 | -1.82    | .23 | .000 | .58           | .22 | .009 | -.80              | .23 | .001 |
| Age2             | .02         | .02 | .341 | -.02         | .02 | .305 | .03      | .02 | .048 | .00           | .02 | .761 | -.05              | .02 | .004 |
| Education, y     | -.36        | .08 | .000 | .43          | .08 | .000 | 1.07     | .08 | .000 | -.07          | .08 | .408 | .46               | .08 | .000 |
| African-American | -1.11       | .53 | .036 | 1.67         | .57 | .004 | .55      | .57 | .342 | .74           | .54 | .170 | 2.24              | .57 | .000 |
| AD               | 2.68        | .78 | .001 | -1.79        | .81 | .027 | -1.72    | .82 | .036 | -1.08         | .85 | .201 | -3.12             | .87 | .001 |
| SLOPE            |             |     |      |              |     |      |          |     |      |               |     |      |                   |     |      |
| TIME             | .03         | .04 | .384 | -.20         | .03 | .000 | -.20     | .03 | .000 | .09           | .04 | .044 | -.12              | .04 | .007 |
| Sex (female=1)   | -.04        | .05 | .395 | -.06         | .04 | .138 | -.11     | .04 | .005 | .04           | .05 | .457 | .02               | .05 | .636 |
| Age              | .06         | .02 | .006 | -.03         | .02 | .151 | -.02     | .02 | .343 | -.06          | .03 | .015 | -.08              | .03 | .001 |
| Age2             | .01         | .00 | .006 | .00          | .00 | .039 | .01      | .00 | .000 | .00           | .00 | .183 | .00               | .00 | .327 |
| Education        | .01         | .01 | .264 | -.01         | .01 | .096 | -.01     | .01 | .238 | .01           | .01 | .171 | -.02              | .01 | .076 |
| African-American | .00         | .06 | .944 | .05          | .06 | .339 | .11      | .05 | .037 | -.01          | .07 | .846 | .10               | .07 | .133 |
| AD               | -.09        | .10 | .391 | .12          | .09 | .218 | -.07     | .09 | .454 | .00           | .13 | .998 | .08               | .13 | .544 |
| SLOPE-squared    |             |     |      |              |     |      |          |     |      |               |     |      |                   |     |      |
| TIME             | .00         | .00 | .003 | -.01         | .00 | .000 | .00      | .00 | .001 | .00           | .00 | .900 | -.01              | .00 | .000 |
| Sex (female=1)   | .00         | .00 | .821 | .00          | .00 | .254 | .00      | .00 | .023 | .00           | .00 | .472 | .00               | .00 | .254 |
| Age              | .00         | .00 | .828 | .00          | .00 | .991 | .00      | .00 | .705 | .00           | .00 | .324 | .00               | .00 | .445 |
| Age2             | .00         | .00 | .063 | .00          | .00 | .222 | .00      | .00 | .000 | .00           | .00 | .138 | .00               | .00 | .824 |
| Education        | .00         | .00 | .484 | .00          | .00 | .210 | .00      | .00 | .731 | .00           | .00 | .089 | .00               | .00 | .200 |
| African-American | .00         | .00 | .168 | .00          | .00 | .119 | .00      | .00 | .243 | .00           | .00 | .633 | .01               | .00 | .115 |
| AD               | .00         | .00 | .261 | .00          | .00 | .425 | .00      | .00 | .900 | .00           | .01 | .910 | .01               | .01 | .213 |

Note: N = 1,881. AD = Alzheimer's disease; Age2 = Age squared.

eTable 2. Estimates From Hierarchical Linear Modeling (HLM) Analyses That Compared AD to Non-Impaired Excluding NEO-PI (1980-1986) Assessments.

|                  | Neuroticism |      |      | Extraversion |      |      | Openness |      |      | Agreeableness |      |      | Conscientiousness |      |      |
|------------------|-------------|------|------|--------------|------|------|----------|------|------|---------------|------|------|-------------------|------|------|
|                  | b           | SE   | P    | b            | SE   | P    | b        | SE   | P    | b             | SE   | P    | b                 | SE   | P    |
| INTERCEPT        | 45.58       | 0.37 | .000 | 49.72        | 0.40 | .000 | 49.30    | 0.41 | .000 | 49.69         | 0.38 | .000 | 52.19             | 0.41 | .000 |
| Sex (female=1)   | 0.63        | 0.42 | .137 | 0.69         | 0.46 | .137 | 3.64     | 0.48 | .000 | 5.42          | 0.45 | .000 | -0.34             | 0.47 | .476 |
| Age              | -0.09       | 0.22 | .673 | -1.88        | 0.23 | .000 | -1.91    | 0.24 | .000 | 0.58          | 0.23 | .011 | -0.87             | 0.24 | .001 |
| Age2             | 0.01        | 0.02 | .440 | -0.04        | 0.02 | .026 | 0.02     | 0.02 | .316 | 0.00          | 0.02 | .809 | -0.05             | 0.02 | .004 |
| Education, y     | -0.37       | 0.08 | .000 | 0.43         | 0.09 | .000 | 1.05     | 0.09 | .000 | -0.12         | 0.08 | .148 | 0.51              | 0.09 | .000 |
| African-American | -0.83       | 0.53 | .116 | 1.04         | 0.57 | .069 | 0.26     | 0.60 | .660 | 0.60          | 0.55 | .281 | 1.91              | 0.59 | .002 |
| AD               | 3.53        | 0.83 | .000 | -1.43        | 0.89 | .111 | -1.22    | 0.93 | .189 | -1.00         | 0.88 | .256 | -3.64             | 0.92 | .000 |
| SLOPE            |             |      |      |              |      |      |          |      |      |               |      |      |                   |      |      |
| TIME             | -0.05       | 0.02 | .017 | -0.11        | 0.02 | .000 | -0.11    | 0.02 | .000 | 0.11          | 0.02 | .000 | 0.03              | 0.02 | .128 |
| Sex (female=1)   | -0.06       | 0.02 | .009 | -0.02        | 0.02 | .461 | -0.05    | 0.02 | .016 | 0.06          | 0.02 | .007 | 0.00              | 0.02 | .849 |
| Age              | 0.07        | 0.01 | .000 | -0.05        | 0.01 | .000 | -0.02    | 0.01 | .082 | -0.05         | 0.01 | .000 | -0.08             | 0.01 | .000 |
| Age2             | 0.00        | 0.00 | .010 | 0.00         | 0.00 | .142 | 0.00     | 0.00 | .000 | 0.00          | 0.00 | .726 | 0.00              | 0.00 | .122 |
| Education        | 0.00        | 0.00 | .300 | -0.01        | 0.00 | .107 | -0.01    | 0.00 | .059 | 0.00          | 0.00 | .859 | -0.01             | 0.00 | .143 |
| African-American | 0.09        | 0.03 | .001 | -0.01        | 0.03 | .584 | 0.06     | 0.03 | .032 | -0.05         | 0.03 | .061 | -0.02             | 0.03 | .583 |
| AD               | 0.07        | 0.06 | .201 | 0.01         | 0.05 | .832 | -0.10    | 0.06 | .056 | 0.00          | 0.06 | .944 | -0.03             | 0.06 | .640 |

Note: N = 1,664

eTable 3. Estimates From Hierarchical Linear Modeling (HLM) Analyses That Compared AD to Non-Impaired Among Individuals With 2 or More Personality Assessment (Excluding Individuals With Only One Personality Assessment).

|                  | Neuroticism |      |      | Extraversion |      |      | Openness |      |      | Agreeableness |      |      | Conscientiousness |      |      |
|------------------|-------------|------|------|--------------|------|------|----------|------|------|---------------|------|------|-------------------|------|------|
|                  | b           | SE   | P    | b            | SE   | P    | b        | SE   | P    | b             | SE   | P    | b                 | SE   | P    |
| INTERCEPT        | 45.40       | 0.38 | .000 | 49.01        | 0.42 | .000 | 48.90    | 0.43 | .000 | 49.71         | 0.40 | .000 | 52.37             | 0.42 | .000 |
| Sex (female=1)   | 0.78        | 0.44 | .079 | 1.38         | 0.50 | .006 | 3.85     | 0.50 | .000 | 5.62          | 0.47 | .000 | -0.59             | 0.50 | .235 |
| Age              | -0.25       | 0.22 | .265 | -1.48        | 0.25 | .000 | -1.82    | 0.26 | .000 | 0.75          | 0.24 | .002 | -0.80             | 0.25 | .002 |
| Age2             | 0.02        | 0.02 | .232 | -0.04        | 0.02 | .042 | 0.01     | 0.02 | .466 | -0.01         | 0.02 | .754 | -0.06             | 0.02 | .003 |
| Education, y     | -0.32       | 0.08 | .000 | 0.44         | 0.10 | .000 | 1.07     | 0.10 | .000 | -0.11         | 0.09 | .225 | 0.44              | 0.09 | .000 |
| African-American | -0.84       | 0.55 | .131 | 1.48         | 0.62 | .017 | 0.50     | 0.63 | .425 | 0.55          | 0.58 | .349 | 2.07              | 0.62 | .001 |
| AD               | 2.95        | 0.82 | .001 | -1.56        | 0.91 | .088 | -1.02    | 0.93 | .273 | -0.88         | 0.87 | .316 | -3.54             | 0.92 | .000 |
| SLOPE            |             |      |      |              |      |      |          |      |      |               |      |      |                   |      |      |
| TIME             | -0.07       | 0.02 | .000 | -0.06        | 0.02 | .001 | -0.11    | 0.02 | .000 | 0.10          | 0.02 | .000 | 0.05              | 0.02 | .006 |
| Sex (female=1)   | -0.04       | 0.02 | .044 | -0.03        | 0.02 | .182 | -0.04    | 0.02 | .035 | 0.08          | 0.02 | .000 | -0.03             | 0.02 | .255 |
| Age              | 0.07        | 0.01 | .000 | -0.03        | 0.01 | .001 | -0.02    | 0.01 | .105 | -0.04         | 0.01 | .000 | -0.08             | 0.01 | .000 |
| Age2             | 0.00        | 0.00 | .003 | 0.00         | 0.00 | .188 | 0.00     | 0.00 | .003 | 0.00          | 0.00 | .685 | 0.00              | 0.00 | .031 |
| Education        | 0.00        | 0.00 | .272 | 0.00         | 0.00 | .393 | 0.00     | 0.00 | .213 | 0.00          | 0.00 | .858 | -0.01             | 0.00 | .198 |
| African-American | 0.10        | 0.03 | .000 | -0.05        | 0.03 | .047 | 0.05     | 0.03 | .049 | -0.05         | 0.03 | .060 | -0.01             | 0.03 | .684 |
| AD               | 0.01        | 0.04 | .878 | 0.07         | 0.04 | .082 | -0.04    | 0.04 | .316 | 0.01          | 0.05 | .753 | -0.06             | 0.05 | .208 |

Note: N = 1,505

eTable 4. Estimates From Hierarchical Linear Modeling (HLM) Analyses That Compared All-Cause Dementia and MCI to Non-Impaired

|                  | Neuroticism |     |      | Extraversion |      |      | Openness |      |      | Agreeableness |      |      | Conscientiousness |      |      |
|------------------|-------------|-----|------|--------------|------|------|----------|------|------|---------------|------|------|-------------------|------|------|
|                  | b           | SE  | P    | b            | SE   | P    | b        | SE   | P    | b             | SE   | P    | b                 | SE   | P    |
| INTERCEPT        | 45.55       | .33 | .000 | 48.73        | .36  | .000 | 48.80    | .36  | .000 | 49.42         | .35  | .000 | 52.07             | .37  | .000 |
| Sex (female=1)   | .81         | .39 | .039 | 1.19         | .43  | .006 | 3.99     | .43  | .000 | 5.49          | .41  | .000 | -.35              | .44  | .417 |
| Age              | -.08        | .20 | .674 | -1.67        | .22  | .000 | -1.77    | .22  | .000 | .67           | .21  | .002 | -.78              | .22  | .001 |
| Age2             | .01         | .02 | .390 | -.01         | .02  | .391 | .03      | .02  | .105 | .01           | .02  | .690 | -.05              | .02  | .004 |
| Education, y     | -.39        | .07 | .000 | .45          | .08  | .000 | 1.09     | .08  | .000 | -.09          | .08  | .218 | .51               | .08  | .000 |
| African-American | -.96        | .51 | .060 | 1.50         | .56  | .008 | .46      | .56  | .414 | .63           | .52  | .227 | 2.06              | .56  | .000 |
| Dementia         | 2.87        | .63 | .000 | -2.38        | .68  | .001 | -1.65    | .68  | .016 | -.98          | .67  | .142 | -4.02             | .72  | .000 |
| MCI              | .01         | .95 | .993 | -1.70        | 1.02 | .095 | -2.95    | 1.03 | .005 | -.18          | 1.00 | .859 | -.92              | 1.07 | .390 |
| SLOPE            |             |     |      |              |      |      |          |      |      |               |      |      |                   |      |      |
| TIME             | -.07        | .02 | .000 | -.06         | .02  | .000 | -.10     | .02  | .000 | .10           | .02  | .000 | .04               | .02  | .024 |
| Sex (female=1)   | -.05        | .02 | .022 | -.02         | .02  | .260 | -.04     | .02  | .033 | .07           | .02  | .001 | -.02              | .02  | .391 |
| Age              | .06         | .01 | .000 | -.04         | .01  | .000 | -.02     | .01  | .047 | -.04          | .01  | .000 | -.07              | .01  | .000 |
| Age2             | .00         | .00 | .010 | .00          | .00  | .099 | .00      | .00  | .002 | .00           | .00  | .631 | .00               | .00  | .140 |
| Education        | .00         | .00 | .477 | .00          | .00  | .426 | -.01     | .00  | .047 | .00           | .00  | .801 | .00               | .00  | .360 |
| African-American | .10         | .03 | .000 | -.06         | .02  | .022 | .04      | .02  | .121 | -.05          | .03  | .039 | -.01              | .03  | .640 |
| Dementia         | .02         | .04 | .491 | .02          | .03  | .498 | -.07     | .03  | .034 | -.02          | .04  | .534 | -.08              | .04  | .071 |
| MCI              | .00         | .06 | .979 | .02          | .05  | .722 | -.09     | .05  | .112 | .03           | .06  | .594 | -.09              | .07  | .184 |

Note: N = 2,046.

eTable 5. Estimates From Hierarchical Linear Modeling (HLM) Analyses That Compared AD, Other Dementias, and MCI to Non-Impaired

|                  | Neuroticism |      |      | Extraversion |      |      | Openness |      |      | Agreeableness |      |      | Conscientiousness |      |      |
|------------------|-------------|------|------|--------------|------|------|----------|------|------|---------------|------|------|-------------------|------|------|
|                  | b           | SE   | P    | b            | SE   | P    | b        | SE   | P    | b             | SE   | P    | b                 | SE   | P    |
| INTERCEPT        | 45.55       | .33  | .000 | 48.74        | .36  | .000 | 48.80    | .36  | .000 | 49.41         | .35  | .000 | 52.08             | .37  | .000 |
| Sex (female=1)   | .81         | .39  | .039 | 1.17         | .43  | .007 | 3.99     | .43  | .000 | 5.50          | .41  | .000 | -.38              | .44  | .380 |
| Age              | -.08        | .20  | .674 | -1.68        | .22  | .000 | -1.77    | .22  | .000 | .67           | .21  | .002 | -.79              | .22  | .001 |
| Age2             | .01         | .02  | .389 | -.01         | .02  | .388 | .03      | .02  | .106 | .01           | .02  | .695 | -.05              | .02  | .004 |
| Education, y     | -.39        | .07  | .000 | .45          | .08  | .000 | 1.09     | .08  | .000 | -.09          | .08  | .219 | .51               | .08  | .000 |
| African-American | -.97        | .51  | .060 | 1.50         | .56  | .008 | .47      | .56  | .409 | .65           | .52  | .219 | 2.05              | .56  | .001 |
| AD               | 2.79        | .71  | .000 | -1.72        | .76  | .024 | -1.45    | .77  | .059 | -1.00         | .76  | .186 | -3.34             | .81  | .000 |
| MCI              | .01         | .95  | .993 | -1.70        | 1.02 | .095 | -2.95    | 1.03 | .005 | -.18          | 1.00 | .859 | -.92              | 1.07 | .391 |
| Other dementias  | 3.10        | 1.20 | .010 | -4.46        | 1.29 | .001 | -2.28    | 1.31 | .081 | -.88          | 1.27 | .491 | -6.08             | 1.36 | .000 |
| SLOPE            |             |      |      |              |      |      |          |      |      |               |      |      |                   |      |      |
| TIME             | -.07        | .02  | .000 | -.06         | .02  | .000 | -.10     | .02  | .000 | .10           | .02  | .000 | .04               | .02  | .024 |
| Sex (female=1)   | -.05        | .02  | .023 | -.02         | .02  | .236 | -.04     | .02  | .029 | .07           | .02  | .001 | -.02              | .02  | .384 |
| Age              | .06         | .01  | .000 | -.04         | .01  | .000 | -.02     | .01  | .041 | -.04          | .01  | .000 | -.07              | .01  | .000 |
| Age2             | .00         | .00  | .010 | .00          | .00  | .097 | .00      | .00  | .002 | .00           | .00  | .638 | .00               | .00  | .139 |
| Education        | .00         | .00  | .468 | .00          | .00  | .402 | -.01     | .00  | .043 | .00           | .00  | .757 | .00               | .00  | .353 |
| African-American | .10         | .03  | .000 | -.06         | .02  | .023 | .04      | .02  | .116 | -.05          | .03  | .041 | -.01              | .03  | .646 |
| AD               | .01         | .04  | .821 | .06          | .04  | .105 | -.04     | .04  | .305 | .01           | .05  | .768 | -.06              | .05  | .222 |
| MCI              | .00         | .06  | .980 | .02          | .05  | .716 | -.09     | .05  | .114 | .03           | .06  | .592 | -.09              | .07  | .185 |
| Other dementias  | .07         | .07  | .299 | -.10         | .07  | .135 | -.18     | .07  | .009 | -.13          | .08  | .081 | -.12              | .08  | .113 |

Note: N = 2,046.

eTable 6. Estimates From Hierarchical Linear Modeling (HLM) Analyses for Neuroticism Facets

|                  | N1: Anxiety |     |      | N2: Angry Hostility |     |      | N3: Depression |     |      | N4: Self-consciousness |     |      | N5: Impulsiveness |     |      | N6: Vulnerability |     |      |
|------------------|-------------|-----|------|---------------------|-----|------|----------------|-----|------|------------------------|-----|------|-------------------|-----|------|-------------------|-----|------|
|                  | b           | SE  | P    | b                   | SE  | P    | b              | SE  | P    | b                      | SE  | P    | b                 | SE  | P    | b                 | SE  | P    |
| INTERCEPT        | 45.99       | .33 | .000 | 47.68               | .34 | .000 | 45.52          | .33 | .000 | 46.78                  | .34 | .000 | 47.65             | .34 | .000 | 46.71             | .34 | .000 |
| Sex (female=1)   | 1.90        | .40 | .000 | -1.85               | .41 | .000 | .28            | .39 | .476 | .37                    | .41 | .358 | .72               | .40 | .072 | 1.58              | .40 | .000 |
| Age              | -.43        | .20 | .034 | -.48                | .21 | .020 | .39            | .20 | .050 | .25                    | .21 | .227 | -1.20             | .20 | .000 | .91               | .21 | .000 |
| Age2             | .00         | .02 | .795 | .00                 | .02 | .971 | .03            | .02 | .030 | .02                    | .02 | .129 | -.03              | .02 | .084 | .03               | .02 | .101 |
| Education, y     | -.25        | .07 | .001 | -.22                | .08 | .004 | -.33           | .07 | .000 | -.36                   | .08 | .000 | -.09              | .07 | .242 | -.47              | .08 | .000 |
| African-American | .15         | .51 | .774 | .06                 | .52 | .904 | -.82           | .50 | .102 | -.20                   | .53 | .703 | -1.46             | .52 | .005 | -2.13             | .52 | .000 |
| AD               | 2.65        | .71 | .000 | 1.70                | .72 | .018 | 3.73           | .70 | .000 | .96                    | .73 | .186 | -.27              | .72 | .703 | 3.88              | .72 | .000 |
| SLOPE            |             |     |      |                     |     |      |                |     |      |                        |     |      |                   |     |      |                   |     |      |
| TIME             | -.05        | .02 | .008 | .00                 | .02 | .903 | -.10           | .02 | .000 | -.06                   | .02 | .004 | -.10              | .02 | .000 | .00               | .02 | .829 |
| Sex (female=1)   | -.03        | .02 | .280 | -.07                | .02 | .002 | -.04           | .02 | .127 | -.03                   | .02 | .133 | -.01              | .02 | .775 | -.04              | .02 | .079 |
| Age              | .05         | .01 | .000 | .04                 | .01 | .000 | .08            | .01 | .000 | .04                    | .01 | .001 | .03               | .01 | .011 | .07               | .01 | .000 |
| Age2             | .00         | .00 | .043 | .00                 | .00 | .805 | .00            | .00 | .001 | .00                    | .00 | .018 | .00               | .00 | .385 | .00               | .00 | .111 |
| Education        | .01         | .00 | .184 | .00                 | .00 | .724 | .01            | .00 | .271 | .00                    | .00 | .450 | .00               | .00 | .328 | .00               | .00 | .710 |
| African-American | .08         | .03 | .008 | .10                 | .03 | .001 | .06            | .03 | .046 | .09                    | .03 | .005 | .05               | .03 | .105 | .08               | .03 | .008 |
| AD               | -.01        | .05 | .897 | .07                 | .05 | .150 | .01            | .05 | .806 | -.03                   | .05 | .519 | -.03              | .05 | .547 | .03               | .05 | .542 |

Note: N = 1,881.



eTable 7. Estimates From Hierarchical Linear Modeling (HLM) Analyses for Extraversion Facets

|                  | E1: Warmth |     |      | E2: Gregariousness |     |      | E3: Assertiveness |     |      | E4: Activity |     |      | E5: Excitement-Seeking |     |      | E6: Positive Emotions |     |      |
|------------------|------------|-----|------|--------------------|-----|------|-------------------|-----|------|--------------|-----|------|------------------------|-----|------|-----------------------|-----|------|
|                  | b          | SE  | P    | b                  | SE  | P    | b                 | SE  | P    | b            | SE  | P    | b                      | SE  | P    | b                     | SE  | P    |
| INTERCEPT        | 49.64      | .35 | .000 | 49.60              | .39 | .000 | 53.38             | .36 | .000 | 48.60        | .36 | .000 | 46.97                  | .33 | .000 | 47.19                 | .37 | .000 |
| Sex (female=1)   | 3.04       | .42 | .000 | 2.05               | .46 | .000 | -.83              | .43 | .052 | 1.77         | .43 | .000 | -3.81                  | .40 | .000 | 3.40                  | .44 | .000 |
| Age              | -.43       | .21 | .045 | -.23               | .24 | .328 | -1.37             | .22 | .000 | -2.04        | .22 | .000 | -.97                   | .20 | .000 | -1.79                 | .23 | .000 |
| Age2             | -.03       | .02 | .046 | -.02               | .02 | .294 | -.05              | .02 | .002 | -.02         | .02 | .340 | .02                    | .02 | .158 | .00                   | .02 | .913 |
| Education, y     | .12        | .08 | .134 | .05                | .09 | .532 | .75               | .08 | .000 | .61          | .08 | .000 | .06                    | .07 | .438 | .28                   | .08 | .001 |
| African-American | -.35       | .54 | .513 | .70                | .60 | .241 | 1.50              | .55 | .007 | -.27         | .55 | .622 | 2.08                   | .51 | .000 | 1.93                  | .57 | .001 |
| AD               | -.61       | .74 | .412 | .17                | .81 | .837 | -1.58             | .75 | .034 | -2.37        | .76 | .002 | -.06                   | .70 | .930 | -2.87                 | .78 | .000 |
| SLOPE            |            |     |      |                    |     |      |                   |     |      |              |     |      |                        |     |      |                       |     |      |
| TIME             | .05        | .02 | .010 | .03                | .02 | .058 | -.02              | .02 | .192 | -.15         | .02 | .000 | -.07                   | .02 | .000 | -.08                  | .02 | .000 |
| Sex (female=1)   | -.05       | .02 | .025 | -.01               | .02 | .628 | .02               | .02 | .339 | -.02         | .02 | .335 | -.01                   | .02 | .652 | -.02                  | .02 | .306 |
| Age              | -.03       | .01 | .004 | -.01               | .01 | .582 | -.04              | .01 | .001 | -.07         | .01 | .000 | .03                    | .01 | .004 | -.04                  | .01 | .002 |
| Age2             | .00        | .00 | .441 | .00                | .00 | .524 | .00               | .00 | .932 | .00          | .00 | .216 | .00                    | .00 | .321 | .00                   | .00 | .037 |
| Education        | -.01       | .00 | .129 | .00                | .00 | .799 | .00               | .00 | .741 | .00          | .00 | .300 | .00                    | .00 | .432 | .00                   | .00 | .446 |
| African-American | -.06       | .03 | .045 | -.02               | .03 | .567 | -.07              | .03 | .009 | -.01         | .03 | .636 | -.02                   | .03 | .452 | -.01                  | .03 | .744 |
| AD               | .08        | .05 | .086 | .12                | .04 | .006 | .03               | .04 | .528 | -.03         | .05 | .558 | .06                    | .04 | .137 | -.05                  | .05 | .289 |

Note: N = 1,881.

eTable 8. Estimates From Hierarchical Linear Modeling (HLM) Analyses for Openness Facets

|                  | O1: Fantasy |     |      | O2: Aesthetics |     |      | O3: Feelings |     |      | O4: Actions |     |      | O5: Ideas |     |      | O6: Values |     |      |
|------------------|-------------|-----|------|----------------|-----|------|--------------|-----|------|-------------|-----|------|-----------|-----|------|------------|-----|------|
|                  | b           | SE  | P    | b              | SE  | P    | b            | SE  | P    | b           | SE  | P    | b         | SE  | P    | b          | SE  | P    |
| INTERCEPT        | 49.55       | .35 | .000 | 49.27          | .37 | .000 | 48.02        | .34 | .000 | 47.11       | .39 | .000 | 51.94     | .36 | .000 | 48.80      | .38 | .000 |
| Sex (female=1)   | -.33        | .42 | .433 | 5.42           | .44 | .000 | 3.60         | .41 | .000 | 5.55        | .46 | .000 | -.76      | .44 | .079 | 2.77       | .45 | .000 |
| Age              | -1.70       | .22 | .000 | -.26           | .23 | .247 | -1.85        | .21 | .000 | -1.64       | .24 | .000 | -.53      | .22 | .018 | -1.46      | .23 | .000 |
| Age2             | .04         | .02 | .010 | .04            | .02 | .035 | -.01         | .02 | .496 | -.02        | .02 | .238 | .02       | .02 | .361 | .01        | .02 | .764 |
| Education, y     | .46         | .08 | .000 | .65            | .08 | .000 | .66          | .08 | .000 | .37         | .09 | .000 | 1.01      | .08 | .000 | .99        | .08 | .000 |
| African-American | -.65        | .55 | .239 | 2.78           | .57 | .000 | -.07         | .53 | .892 | .01         | .60 | .992 | .20       | .56 | .724 | -1.25      | .58 | .031 |
| AD               | -.86        | .75 | .252 | .57            | .77 | .456 | -.85         | .74 | .248 | -1.45       | .82 | .076 | -1.68     | .76 | .027 | -1.47      | .80 | .064 |
| SLOPE            |             |     |      |                |     |      |              |     |      |             |     |      |           |     |      |            |     |      |
| TIME             | -.05        | .02 | .005 | -.02           | .02 | .204 | -.09         | .02 | .000 | -.16        | .02 | .000 | -.01      | .02 | .616 | -.10       | .02 | .000 |
| Sex (female=1)   | -.06        | .02 | .006 | -.04           | .02 | .066 | -.07         | .02 | .005 | .02         | .02 | .406 | -.02      | .02 | .365 | .04        | .02 | .098 |
| Age              | .03         | .01 | .022 | -.02           | .01 | .099 | .00          | .01 | .833 | -.05        | .01 | .000 | -.02      | .01 | .144 | -.01       | .01 | .526 |
| Age2             | .00         | .00 | .005 | .00            | .00 | .130 | .00          | .00 | .009 | .00         | .00 | .552 | .00       | .00 | .381 | .00        | .00 | .233 |
| Education        | -.01        | .00 | .177 | .00            | .00 | .211 | .00          | .00 | .280 | -.01        | .00 | .015 | .00       | .00 | .809 | .01        | .00 | .077 |
| African-American | .02         | .03 | .593 | .05            | .03 | .078 | .05          | .03 | .101 | .00         | .03 | .966 | .03       | .03 | .338 | .04        | .03 | .207 |
| AD               | -.01        | .05 | .840 | .03            | .04 | .496 | -.05         | .05 | .305 | -.06        | .05 | .201 | -.03      | .04 | .421 | -.08       | .05 | .100 |

Note: N = 1,881.

eTable 9. Estimates From Hierarchical Linear Modeling (HLM) Analyses for Agreeableness Facets

|                  | A1: Trust |     |      | A2: Straightforwardness |     |      | A3: Altruism |     |      | A4: Compliance |     |      | A5: Modesty |     |      | A6: Tender-mindedness |     |      |
|------------------|-----------|-----|------|-------------------------|-----|------|--------------|-----|------|----------------|-----|------|-------------|-----|------|-----------------------|-----|------|
|                  | b         | SE  | P    | b                       | SE  | P    | b            | SE  | P    | b              | SE  | P    | b           | SE  | P    | b                     | SE  | P    |
| INTERCEPT        | 52.11     | .35 | .000 | 50.82                   | .36 | .000 | 49.61        | .38 | .000 | 49.65          | .39 | .000 | 47.07       | .38 | .000 | 49.04                 | .40 | .000 |
| Sex (female=1)   | 2.46      | .41 | .000 | 3.39                    | .42 | .000 | 3.59         | .44 | .000 | 4.74           | .45 | .000 | 3.69        | .45 | .000 | 3.83                  | .46 | .000 |
| Age              | .60       | .21 | .004 | .60                     | .21 | .006 | -.57         | .22 | .011 | 1.76           | .23 | .000 | -.15        | .23 | .500 | -.04                  | .23 | .864 |
| Age2             | .00       | .02 | .803 | -.02                    | .02 | .299 | -.04         | .02 | .016 | .04            | .02 | .034 | .01         | .02 | .676 | .00                   | .02 | .848 |
| Education, y     | .31       | .08 | .000 | -.01                    | .08 | .904 | -.05         | .08 | .510 | -.05           | .08 | .523 | -.55        | .08 | .000 | -.15                  | .09 | .081 |
| African-American | -1.97     | .50 | .000 | -.81                    | .52 | .122 | 1.10         | .54 | .044 | -.39           | .56 | .492 | 1.38        | .56 | .013 | 3.84                  | .57 | .000 |
| AD               | .79       | .81 | .333 | -.77                    | .85 | .367 | -1.37        | .88 | .120 | .24            | .90 | .787 | -1.72       | .89 | .054 | -1.24                 | .93 | .182 |
| SLOPE            |           |     |      |                         |     |      |              |     |      |                |     |      |             |     |      |                       |     |      |
| TIME             | -.01      | .02 | .600 | .11                     | .02 | .000 | .04          | .02 | .083 | .09            | .02 | .000 | .07         | .02 | .002 | .11                   | .03 | .000 |
| Sex (female=1)   | .05       | .03 | .030 | .01                     | .03 | .838 | .01          | .03 | .658 | .05            | .03 | .043 | .12         | .03 | .000 | .01                   | .03 | .816 |
| Age              | -.04      | .01 | .004 | -.04                    | .01 | .007 | -.06         | .01 | .000 | -.03           | .01 | .046 | -.02        | .01 | .113 | -.01                  | .01 | .535 |
| Age2             | .00       | .00 | .819 | .00                     | .00 | .069 | .00          | .00 | .995 | .00            | .00 | .780 | .00         | .00 | .977 | .00                   | .00 | .232 |
| Education        | -.01      | .01 | .318 | .01                     | .01 | .062 | -.01         | .01 | .212 | .00            | .01 | .826 | .00         | .01 | .360 | -.01                  | .01 | .120 |
| African-American | -.02      | .03 | .592 | -.02                    | .03 | .634 | -.05         | .03 | .153 | -.05           | .03 | .123 | -.02        | .03 | .632 | -.06                  | .04 | .090 |
| AD               | .08       | .06 | .179 | .04                     | .07 | .535 | -.02         | .07 | .761 | .09            | .07 | .171 | -.10        | .06 | .107 | -.10                  | .07 | .179 |

Note: N = 1,881.

eTable 10. Estimates From Hierarchical Linear Modeling (HLM) Analyses for Conscientiousness Facets

|                  | C1: Competence |     |      | C2: Order |     |      | C3: Dutifulness |     |      | C4: Achievement Striving |     |      | C5: Self-Discipline |     |      | C6: Deliberation |     |      |
|------------------|----------------|-----|------|-----------|-----|------|-----------------|-----|------|--------------------------|-----|------|---------------------|-----|------|------------------|-----|------|
|                  | b              | SE  | P    | b         | SE  | P    | b               | SE  | P    | b                        | SE  | P    | b                   | SE  | P    | b                | SE  | P    |
| INTERCEPT        | 54.24          | .39 | .000 | 48.57     | .40 | .000 | 53.36           | .35 | .000 | 51.29                    | .40 | .000 | 49.28               | .42 | .000 | 53.39            | .38 | .000 |
| Sex (female=1)   | .25            | .45 | .579 | .24       | .47 | .604 | .28             | .40 | .490 | -1.10                    | .47 | .019 | -.60                | .49 | .218 | -.47             | .44 | .279 |
| Age              | -1.57          | .23 | .000 | -.22      | .24 | .348 | -.04            | .21 | .834 | -.91                     | .24 | .000 | -.87                | .25 | .001 | -.33             | .22 | .136 |
| Age2             | -.07           | .02 | .000 | -.02      | .02 | .375 | -.04            | .02 | .004 | -.02                     | .02 | .174 | -.05                | .02 | .008 | -.03             | .02 | .052 |
| Education, y     | .76            | .08 | .000 | .14       | .09 | .106 | .25             | .08 | .001 | .63                      | .09 | .000 | .28                 | .09 | .002 | .23              | .08 | .006 |
| African-American | 1.96           | .56 | .001 | 1.76      | .58 | .003 | -2.35           | .50 | .000 | 2.59                     | .58 | .000 | 1.89                | .61 | .002 | 2.46             | .54 | .000 |
| AD               | -3.88          | .90 | .000 | -3.41     | .93 | .000 | -2.79           | .82 | .001 | -.89                     | .93 | .342 | -4.17               | .97 | .000 | -1.36            | .87 | .119 |
| SLOPE            |                |     |      |           |     |      |                 |     |      |                          |     |      |                     |     |      |                  |     |      |
| TIME             | .04            | .02 | .088 | -.02      | .02 | .513 | .04             | .02 | .071 | .05                      | .02 | .057 | -.03                | .03 | .307 | .11              | .02 | .000 |
| Sex (female=1)   | -.02           | .03 | .545 | .03       | .03 | .329 | .02             | .03 | .474 | -.02                     | .03 | .394 | .01                 | .03 | .739 | -.01             | .03 | .838 |
| Age              | -.07           | .01 | .000 | -.03      | .01 | .056 | -.07            | .01 | .000 | -.03                     | .01 | .075 | -.07                | .01 | .000 | -.05             | .01 | .000 |
| Age2             | .00            | .00 | .093 | .00       | .00 | .942 | .00             | .00 | .080 | .00                      | .00 | .704 | .00                 | .00 | .299 | .00              | .00 | .201 |
| Education        | .00            | .01 | .964 | .00       | .01 | .485 | .00             | .01 | .357 | -.02                     | .01 | .000 | .00                 | .01 | .809 | .00              | .01 | .552 |
| African-American | -.06           | .03 | .094 | .01       | .03 | .658 | -.02            | .03 | .574 | -.03                     | .03 | .434 | .02                 | .03 | .477 | -.04             | .03 | .225 |
| AD               | .01            | .07 | .879 | -.11      | .07 | .110 | -.04            | .07 | .541 | -.06                     | .07 | .375 | -.08                | .07 | .271 | .08              | .07 | .206 |

Note: N = 1,881.

eTable 11. Mean-Level and Rank-Order Stability Over Last Two Personality Assessments.

|                   | Not impaired |        |      | AD      |         |      |
|-------------------|--------------|--------|------|---------|---------|------|
|                   | Time -1      | Time 0 | rtt  | Time -2 | Time -1 | rtt  |
| Neuroticism       | 46.04        | 46.06  | 0.84 | 49.05   | 48.47   | 0.87 |
| Extraversion      | 49.87        | 49.48  | 0.88 | 47.41   | 46.87   | 0.89 |
| Openness          | 51.58        | 51.21  | 0.89 | 50.13   | 49.6    | 0.88 |
| Agreeableness     | 51.83        | 52.4   | 0.84 | 51.37   | 51.48   | 0.82 |
| Conscientiousness | 51.89        | 51.82  | 0.86 | 47.91   | 48.06   | 0.82 |
| age               | 69.37        | 73.13  |      | 77.58   | 80.58   |      |
| time              | -3.76        | 0      |      | -6.44   | -3.47   |      |

Notes: Not impaired (n = 1,374); AD = Alzheimer's disease (n = 131).
